# Supplementary material for: Electrochemical protonation/deprotonation of TiNb2O7 in protic ionic liquids
Source: Royal Society of Chemistry journal article supplement (doi:10.1039/d4cp04651j), 2025-01-01
Supplement: d4cp04651j1.pdf [file d4cp04651j1.pdf]

# Electronic Supplementary Information

## Electrochemical Protonation/Deprotonation of $\text{TiNb}_2\text{O}_7$ in Protic Ionic Liquids

Department of Materials Chemistry, Faculty of Engineering, Shinshu University  
4-17-1 Wakasato, Nagano 380-8553, Japan

Masahiro Shimizu,\* Takuya Kawai,  
Tomonori Ichikawa, Susumu Arai

Dr. Masahiro Shimizu  
Tel: +81-26-269-5627; Fax: +81-26-269-5432  
E-mail: [shimizu@shinshu-u.ac.jp](mailto:shimizu@shinshu-u.ac.jp)

| Temperature / °C | Ionic conductivity / mS cm <sup>-1</sup> (AcOH/Im) |      |      |      |       | Ionic conductivity / mS cm <sup>-1</sup> (AcOH/DBU) |      |      |      |      |
|------------------|----------------------------------------------------|------|------|------|-------|-----------------------------------------------------|------|------|------|------|
|                  | x=0.1                                              | 0.2  | 0.3  | 0.4  | 0.5   | x=0.1                                               | 0.2  | 0.3  | 0.4  | 0.5  |
| 20               | 0.46                                               | 1.00 | 1.67 | 2.49 | 4.33  | 0.05                                                | 0.07 | 0.06 | 0.02 | 0.01 |
| 25               | 0.51                                               | 1.11 | 1.88 | 2.83 | 4.99  | 0.06                                                | 0.09 | 0.08 | 0.04 | 0.01 |
| 30               | 0.56                                               | 1.24 | 2.11 | 3.20 | 5.74  | 0.08                                                | 0.12 | 0.12 | 0.06 | 0.02 |
| 35               | 0.61                                               | 1.37 | 2.33 | 3.60 | 6.56  | 0.10                                                | 0.16 | 0.17 | 0.10 | 0.04 |
| 40               | 0.66                                               | 1.53 | 2.58 | 4.02 | 7.39  | 0.12                                                | 0.21 | 0.22 | 0.14 | 0.07 |
| 45               | 0.72                                               | 1.67 | 2.85 | 4.45 | 8.29  | 0.14                                                | 0.27 | 0.30 | 0.21 | 0.13 |
| 50               | 0.77                                               | 1.81 | 3.12 | 4.91 | 9.18  | 0.17                                                | 0.33 | 0.38 | 0.29 | 0.19 |
| 55               | 0.82                                               | 1.96 | 3.37 | 5.38 | 10.10 | 0.20                                                | 0.40 | 0.48 | 0.39 | 0.31 |
| 60               | 0.88                                               | 2.10 | 3.64 | 5.87 | 11.05 | 0.24                                                | 0.48 | 0.60 | 0.52 | 0.41 |
| 65               | 0.93                                               | 2.24 | 3.95 | 6.36 | 12.02 | 0.28                                                | 0.58 | 0.74 | 0.66 | 0.59 |
| 70               | 0.99                                               | 2.38 | 4.22 | 6.88 | 12.99 | 0.31                                                | 0.68 | 0.90 | 0.83 | 0.83 |
| 75               | 1.04                                               | 2.54 | 4.49 | 7.41 | 13.96 | 0.36                                                | 0.78 | 1.07 | 1.02 | 1.24 |

  

| Temperature / °C | Ionic conductivity / mS cm <sup>-1</sup> (HTFSA/Im) |       |       |       |       | Ionic conductivity / mS cm <sup>-1</sup> (HTFSA/DBU) |      |      |      |      |
|------------------|-----------------------------------------------------|-------|-------|-------|-------|------------------------------------------------------|------|------|------|------|
|                  | x=0.1                                               | 0.2   | 0.3   | 0.4   | 0.5   | x=0.1                                                | 0.2  | 0.3  | 0.4  | 0.5  |
| 20               | 15.04                                               | 10.17 | 7.09  | 3.83  |       | 0.76                                                 | 0.63 | 0.29 | 0.35 |      |
| 25               | 16.77                                               | 11.75 | 8.43  | 4.66  |       | 0.93                                                 | 0.82 | 0.41 | 0.50 |      |
| 30               | 18.58                                               | 13.74 | 9.93  | 5.62  |       | 1.15                                                 | 1.07 | 0.58 | 0.69 | 1.15 |
| 35               | 20.47                                               | 15.72 | 11.42 | 6.77  |       | 1.39                                                 | 1.35 | 0.80 | 0.93 | 1.49 |
| 40               | 22.39                                               | 17.82 | 13.19 | 7.98  |       | 1.65                                                 | 1.67 | 1.06 | 1.22 | 1.88 |
| 45               | 24.35                                               | 20.01 | 15.07 | 9.29  |       | 1.94                                                 | 2.03 | 1.37 | 1.56 | 2.34 |
| 50               | 26.39                                               | 22.34 | 17.06 | 10.73 | 6.56  | 2.26                                                 | 2.44 | 1.74 | 1.95 | 2.85 |
| 55               | 28.42                                               | 24.70 | 19.16 | 12.16 | 7.59  | 2.59                                                 | 2.88 | 2.16 | 2.40 | 3.43 |
| 60               | 30.48                                               | 27.10 | 21.41 | 13.79 | 8.71  | 2.94                                                 | 3.36 | 2.63 | 2.89 | 4.09 |
| 65               | 32.59                                               | 29.92 | 23.76 | 15.54 | 9.92  | 3.31                                                 | 3.89 | 3.17 | 3.45 | 4.80 |
| 70               | 34.99                                               | 32.56 | 26.10 | 17.40 | 11.21 | 3.71                                                 | 4.47 | 3.77 | 4.07 | 5.60 |
| 75               | 37.09                                               | 35.38 | 28.50 | 19.34 | 12.60 | 4.13                                                 | 5.07 | 4.43 | 4.73 | 6.46 |

**Table S1.** Summary of ionic conductivities for (AcOH)<sub>x</sub>(Im)<sub>1-x</sub>, (AcOH)<sub>x</sub>(DBU)<sub>1-x</sub>, (HTFSA)<sub>x</sub>(Im)<sub>1-x</sub> and (HTFSA)<sub>x</sub>(Im)<sub>1-x</sub> (x=0.1, 0.2, 0.3, 0.4, 0.5).

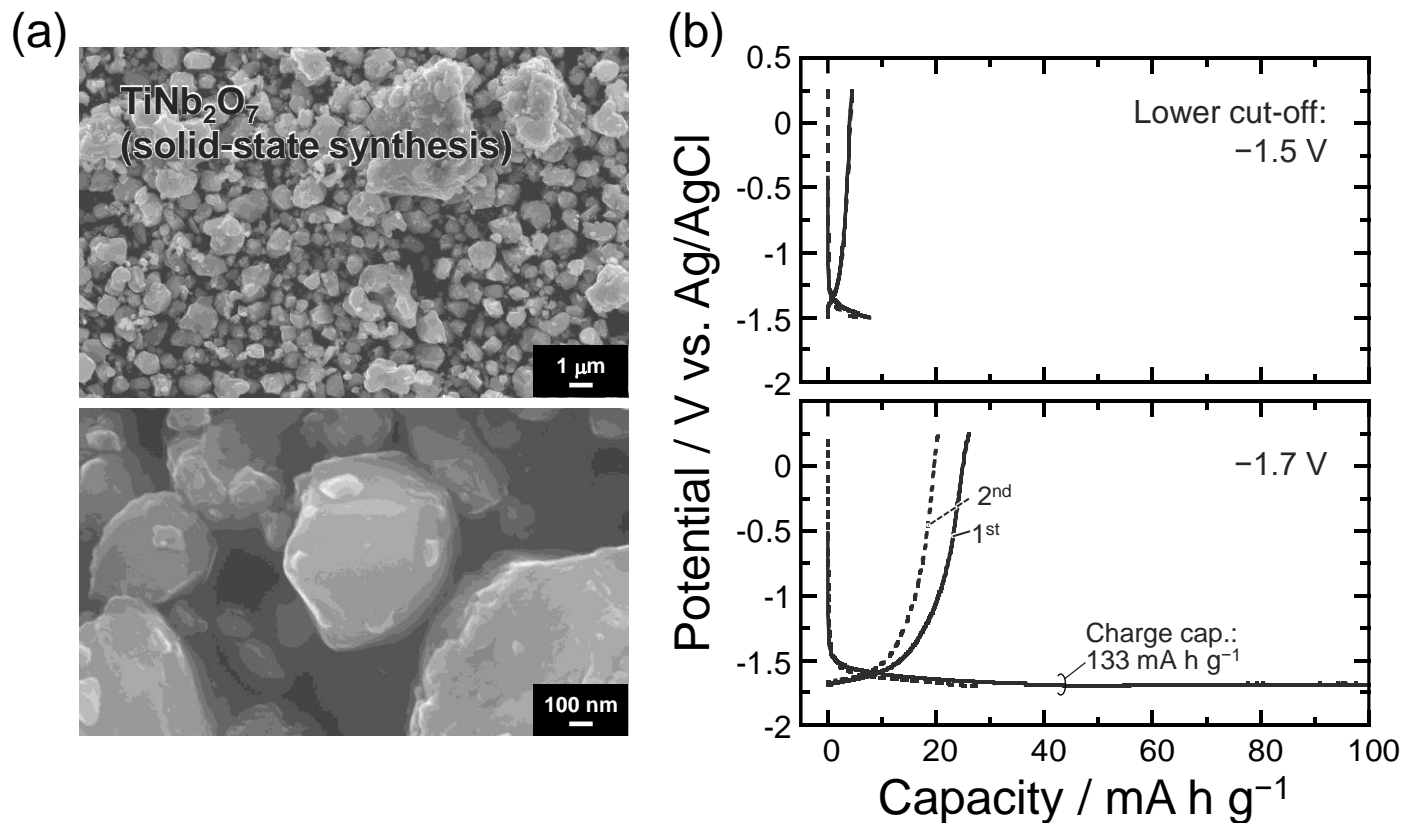

**Figure S1.** (a) SEM images of  $\text{TiNb}_2\text{O}_7$  prepared by solid-state synthesis from anatase  $\text{TiO}_2$  and  $\text{Nb}_2\text{O}_5$ . (b) Galvanostatic charge/discharge (protonation/deprotonation) curves of the  $\text{TiNb}_2\text{O}_7$  in the electrolyte of  $(\text{HTFSA})_{0.4}(\text{DBU})_{0.6}$ . The lower cut-off potentials in the test are (upper)  $-1.5$  and (lower)  $-1.7$  V vs. Ag/AgCl, respectively. Regardless of the lower cut-off potential, the  $\text{TiNb}_2\text{O}_7$  synthesized *via* the solid-state method (calcination) exhibited no electrochemical activity toward protonation.

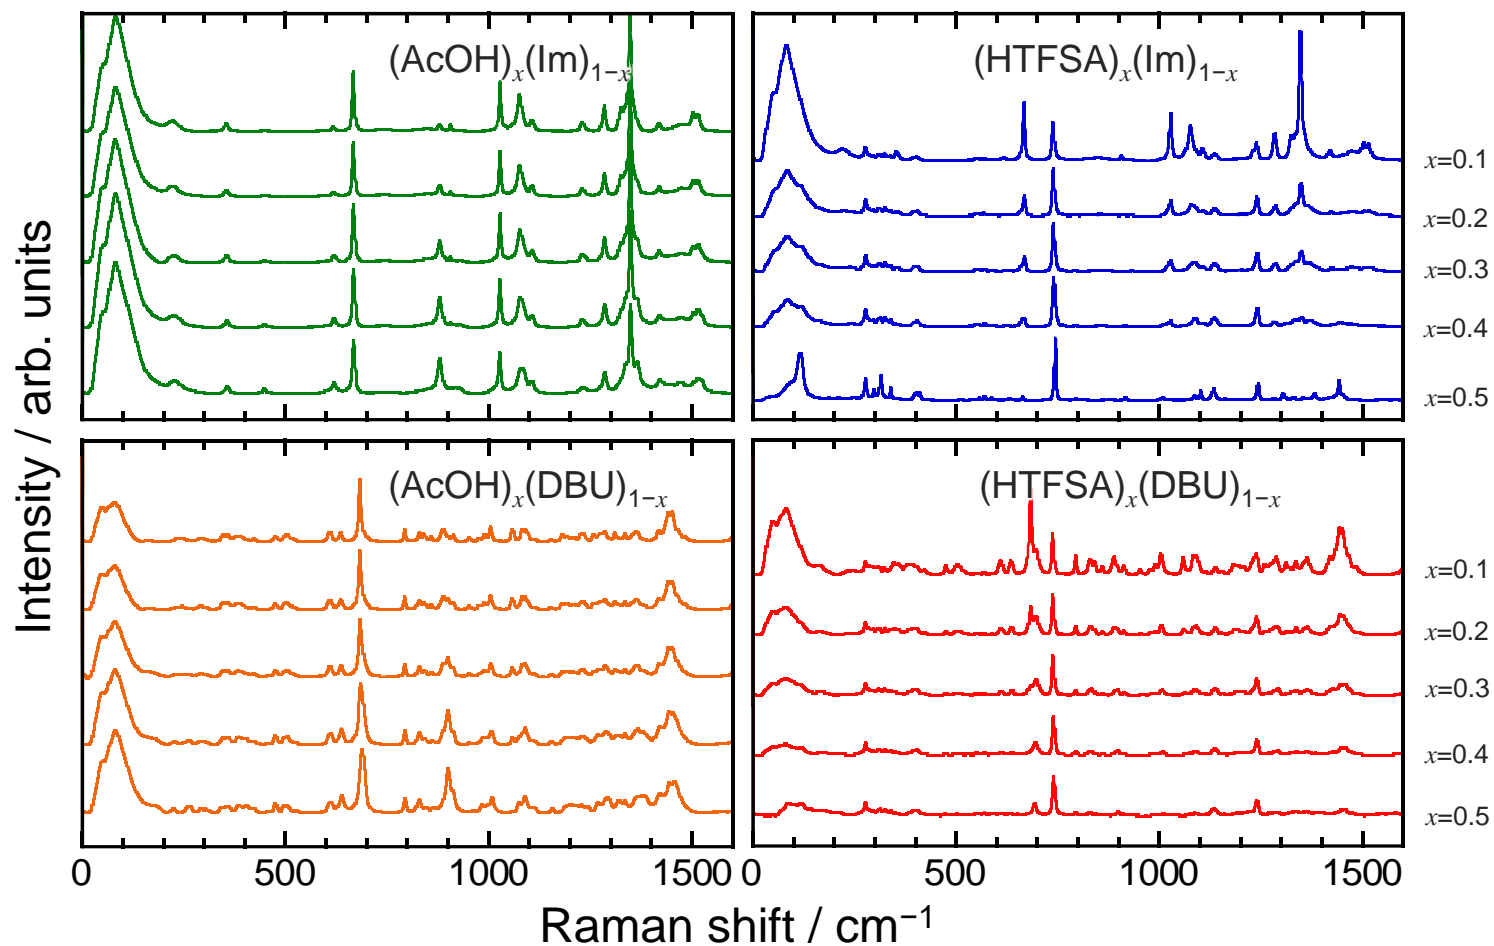

**Figure S2.** Raman spectra of  $(\text{AcOH})_x(\text{Im})_{1-x}$ ,  $(\text{AcOH})_x(\text{DBU})_{1-x}$ ,  $(\text{HTFSA})_x(\text{Im})_{1-x}$ , and  $(\text{HTFSA})_x(\text{DBU})_{1-x}$  ( $x=0.1, 0.2, 0.3, 0.4, 0.5$ ). We tightly sealed the electrolyte solution in a quartz cell in an argon-filled glove box to prevent exposure to water vapor.

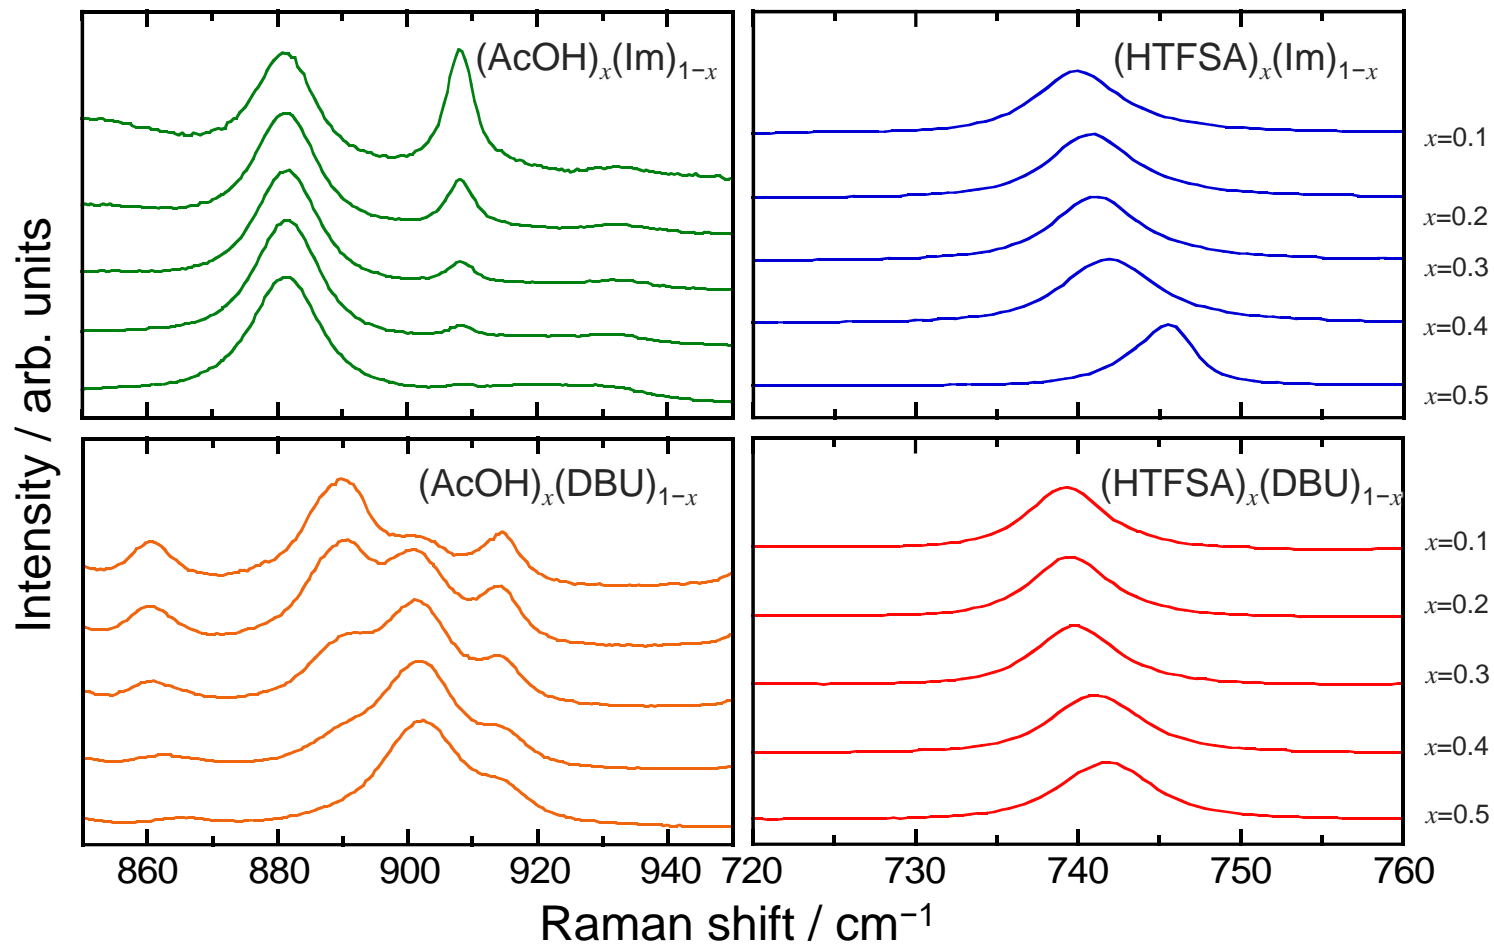

**Figure S3.** Enlarged views of Raman spectra. In the case of  $(\text{AcOH})_x(\text{Im})_{1-x}$ , no band shift is observed, indicating the absence of  $\text{AcO}^-$  regardless of the molar ratio of the Brønsted acid/base. In contrast, band shifts are recognized for  $(\text{AcOH})_x(\text{DBU})_{1-x}$ , suggesting that proton transfer to DBU occurs, leading to ionization into  $\text{AcO}^-$ .

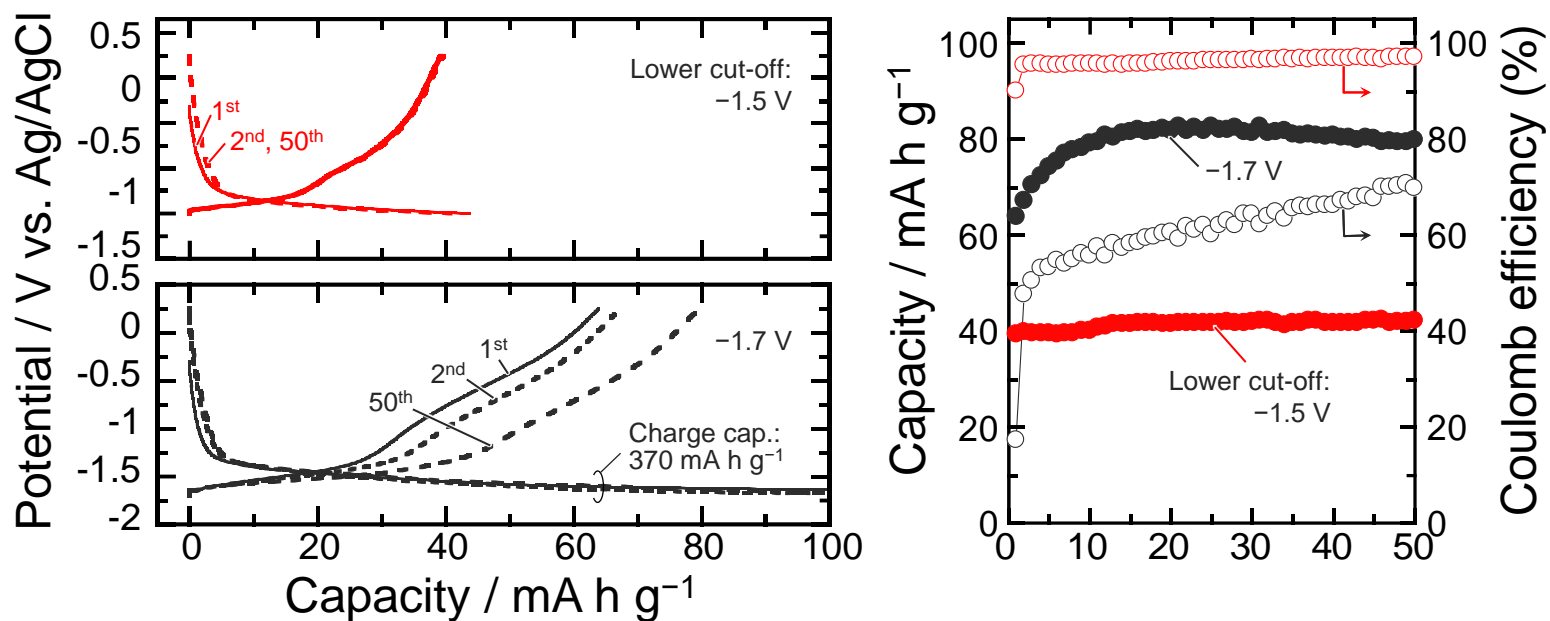

**Figure S4.** Galvanostatic charge/discharge (protonation/deprotonation) profiles of  $\text{TiNb}_2\text{O}_7$  electrodes in  $(\text{HTFSA})_{0.4}(\text{DBU})_{0.6}$ . The lower cut-off potentials are (upper)  $-1.5$  and (lower)  $-1.7$  V, respectively. We attempted to store protons by setting the lower cut-off potential to the negative side of  $-1.7$  V. The reversible capacity at the first cycle increased from  $40$  to  $64$   $\text{mA h g}^{-1}$ , while the Coulomb efficiency decreased from  $90$  to  $17\%$ . The charge capacities at the cut-off potential in first charge cycle are  $44$  and  $370$   $\text{mA h g}^{-1}$ .
